# Supplementary material for: Mechanistic study of structural regulation and enhanced oxygen reduction performance in La0.5Sr1.5FeO4+δ cathodes via Mg doping
Source: Royal Society of Chemistry journal article supplement (doi:10.1039/d6ra03050e), 2026-05-22
Supplement: d6ra03050e1.pdf [file d6ra03050e1.pdf]

## Supporting Information

### Mechanistic Study of Structural Regulation and Enhanced Oxygen Reduction Performance in $\text{La}_{0.5}\text{Sr}_{1.5}\text{FeO}_{4+\delta}$ Cathodes via Mg Doping

Yanpeng Liu<sup>a</sup>, Songbo Li<sup>\*.a</sup>, Shengli An<sup>b</sup>, Hongli Qiao<sup>a</sup>, Yuanyaun Ma<sup>a</sup>, Jia Xu<sup>c,d</sup>, Jing Zhang<sup>a</sup>, Xu Zhang<sup>a</sup>, Jianlin Zhao<sup>a</sup>

<sup>a</sup> College of Chemistry and Chemical Engineering, Inner Mongolia University of Science & Technology, Baotou 014010, China

<sup>b</sup> College of Rare Earth Industry, Inner Mongolia University of Science and Technology, Baotou 014010, China

<sup>c</sup> School of Rare Earth Industry, Inner Mongolia University of Science and Technology, Baotou 014010, China.

<sup>d</sup> Analysis and Testing Center, Inner Mongolia University of Science and Technology, Baotou 014010, China.

#### Corresponding author

\*Email: [lisongbo@imust.edu.cn](mailto:lisongbo@imust.edu.cn)

Table S1. shows the ASR values of  $\text{LSFM}_x$  ( $x=0.000, 0.025, 0.050, 0.075, 0.100$ ) within the range of 600-800 °C

| T (°C) | ASR ( $\Omega\cdot\text{cm}^2$ ) |                       |                       |                       |                       |
|--------|----------------------------------|-----------------------|-----------------------|-----------------------|-----------------------|
|        | LSF                              | $\text{LSFM}_{0.025}$ | $\text{LSFM}_{0.050}$ | $\text{LSFM}_{0.075}$ | $\text{LSFM}_{0.100}$ |
| 800    | 0.201                            | 0.180                 | 0.086                 | 0.121                 | 0.129                 |
| 750    | 0.330                            | 0.277                 | 0.118                 | 0.209                 | 0.250                 |
| 700    | 0.541                            | 0.481                 | 0.195                 | 0.479                 | 0.383                 |
| 650    | 1.116                            | 0.897                 | 0.411                 | 0.689                 | 0.774                 |
| 600    | 2.823                            | 2.033                 | 0.747                 | 1.257                 | 1.520                 |

Table S2. Migration barrier of O atom on Sr exposed  $\text{La}_9\text{Sr}_{27}\text{Fe}_{18}\text{O}_{63}(100)$  and  $\text{La}_9\text{Sr}_{27}\text{Fe}_{17}\text{Mg}_1\text{O}_{63}(100)$ .

| Srexposed-O-migration path | Relative energy (eV)                                        |                                                                        |
|----------------------------|-------------------------------------------------------------|------------------------------------------------------------------------|
|                            | $\text{La}_9\text{Sr}_{27}\text{Fe}_{18}\text{O}_{63}(100)$ | $\text{La}_9\text{Sr}_{27}\text{Fe}_{17}\text{Mg}_1\text{O}_{63}(100)$ |
| 00-IS                      | 0.000000                                                    | 0.000000                                                               |
| 01                         | -0.580100                                                   | 0.257300                                                               |
| 02-TS                      | -0.508500                                                   | 0.587400                                                               |
| 03                         | -0.851400                                                   | 0.191900                                                               |
| 04                         | -1.626100                                                   | -0.137400                                                              |
| 05-FS                      | -1.945900                                                   | -0.223600                                                              |

Table S3. Formation energy of oxygen vacancy on Sr exposed  $\text{La}_9\text{Sr}_{27}\text{Fe}_{18}\text{O}_{63}(100)$  and  $\text{La}_9\text{Sr}_{27}\text{Fe}_{17}\text{Mg}_1\text{O}_{63}(100)$ .

| System                                                                                 | Energy (eV) | Formation energy of oxygen vacancy | Average formation energy of $\text{O}_v$ |
|----------------------------------------------------------------------------------------|-------------|------------------------------------|------------------------------------------|
| $\text{La}_9\text{Sr}_{27}\text{Fe}_{18}\text{O}_{63}(100)$ -Srexposed                 | -771.6892   |                                    |                                          |
| $\text{La}_9\text{Sr}_{27}\text{Fe}_{18}\text{O}_{63}(100)$ -Srexposed-O-IS            | -764.5586   | 2.2024                             | 1.2295                                   |
| $\text{La}_9\text{Sr}_{27}\text{Fe}_{18}\text{O}_{63}(100)$ -Srexposed-O-FS            | -766.5045   | 0.2565                             |                                          |
| $\text{La}_9\text{Sr}_{27}\text{Fe}_{17}\text{Mg}_1\text{O}_{63}(100)$ -Srexposed      | -770.3266   |                                    |                                          |
| $\text{La}_9\text{Sr}_{27}\text{Fe}_{17}\text{Mg}_1\text{O}_{63}(100)$ -Srexposed-O-IS | -761.0130   | 4.3854                             | 4.2736                                   |
| $\text{La}_9\text{Sr}_{27}\text{Fe}_{17}\text{Mg}_1\text{O}_{63}(100)$ -Srexposed-O-FS | -761.2366   | 4.1618                             |                                          |
| $\text{O}_2(\text{g})$                                                                 | -9.8563     |                                    |                                          |
